# Supplementary material for: A Potential Serum N-glycan Biomarker for Hepatitis C Virus-Related Early-Stage Hepatocellular Carcinoma with Liver Cirrhosis
Source: Int J Mol Sci. 2020 Nov 24;21(23):8913. doi: 10.3390/ijms21238913 (PMC7727814; doi:10.3390/ijms21238913)
Supplement: Supplementary file 1 [file ijms-21-08913-s001.pdf]

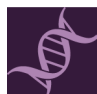

*Supplementary Materials*

# A Potential Serum N-glycan Biomarker for Hepatitis C Virus-Related Early-Stage Hepatocellular Carcinoma with Liver Cirrhosis

Mikito Higashi <sup>1,2,†</sup>, Takeshi Yoshimura <sup>1,3,4,†,\*</sup>, Noriyoshi Usui <sup>5,6</sup>, Yuichiro Kano <sup>1</sup>, Akihiro Deguchi <sup>7</sup>, Kazuhiro Tanabe <sup>2</sup>, Youichi Uchimura <sup>2,¶</sup>, Shigeki Kuriyama <sup>7,¶</sup>, Yasuyuki Suzuki <sup>8</sup>, Tsutomu Masaki <sup>7</sup> and Kazuhiro Ikenaka <sup>1,3,¶,\*</sup>

<sup>1</sup> Division of Neurobiology and Bioinformatics, National Institute for Physiological Sciences, National Institutes of Natural Sciences, Okazaki, Aichi 444-8787, Japan

<sup>2</sup> Mitsubishi Chemical Group Science and Technology Research Center, Yokohama, Kanagawa 227-8502, Japan

<sup>3</sup> Department of Physiological Sciences, School of Life Sciences, SOKENDAI (The Graduate University for Advanced Studies), Hayama, Kanagawa 240-0193, Japan

<sup>4</sup> Department of Child Development and Molecular Brain Science, United Graduate School of Child Development, Osaka University, Suita, Osaka 565-0871, Japan

<sup>5</sup> Department of Neuroscience and Cell Biology, Graduate School of Medicine, Osaka University, Suita, Osaka 565-0871, Japan

<sup>6</sup> Addiction Research Unit, Osaka Psychiatric Research Center, Osaka Psychiatric Medical Center, Osaka 541-8567, Japan

<sup>7</sup> Department of Gastroenterology and Neurology, Faculty of Medicine, Kagawa University, Kita-gun, Kagawa 761-0793, Japan

<sup>8</sup> Department of Gastroenterological Surgery, Faculty of Medicine, Kagawa University, Kita-gun, Kagawa 761-0793, Japan

\* Correspondence: tyoshimu@ugscd.osaka-u.ac.jp (T.Y.); ikenaka@nips.ac.jp (K.I.)

† These authors contributed equally to this work.

¶ Deceased.

## Supplementary Materials and Methods

### *Sample preparations*

Human sera from subjects with no obvious liver diseases were obtained from Soiken Holdings Inc, Tokyo, Japan. Cold acetone (9 mL) was added to 1 mL of serum; the sample was mixed well and centrifuged at  $4,000 \times g$  for 20 min at 4 °C. Preparations of pyridylaminated *N*-glycans [1-3] and neutral and desialylated *N*-glycans [1-9] were performed as previously described. For pyridylaminated *N*-glycans, a lyophilized sample (2 mg) was heated with 200  $\mu$ L anhydrous hydrazine (Tokyo Chemical Industry, Tokyo, Japan) at 100 °C for 10 h to release sugar chains. The hydrazine solution was then mixed with 3 mL 50 mM ammonium acetate buffer (pH 7.0) and loaded onto a graphite carbon column (GL Science, Tokyo, Japan). Oligosaccharides were eluted with 5 mL of a mixed solution (20 mM triethylamine acetate buffer (pH 7.0) and 60% acetonitrile containing 2% acetic anhydride). The eluted solution was dried using a SpeedVac to obtain the *N*-acetylated oligosaccharides. For neutral and desialylated *N*-glycans, purified glycans were tagged with a fluorophore, 2-aminopyridine. Excess reagent was removed with a cellulose cartridge column (Takara Bio, Ohtsu, Japan). Pyridylaminated (PA)-oligosaccharides were divided into two equal volumes. One half was applied to a DE52 column (Whatman, GE Healthcare, Little Chalfont, UK) equilibrated with water adjusted to pH 9.0 by 1 M aqueous ammonia [1]; the non-adsorbed fraction was collected. The other half was treated with neuraminidase (Nacalai Tesque, Kyoto, Japan) and applied to a DE52 column.

### *N-glycan analyses*

Analyses of PA-*N*-glycans using HPLC were performed as described previously [1,3,9]. Sodium dodecyl sulfate-polyacrylamide gel electrophoresis (SDS-PAGE) with Coomassie Brilliant Blue (CBB) staining and *N*-glycan analysis from SDS-PAGE gels were also performed as described previously [3]. Fluorescent-tagged glycans were analyzed by HPLC using a NP column (Shodex Asahipak NH2P-50 4E,  $4.6 \times 250$  mm, Showa Denko, Tokyo, Japan). The mobile phase consisted of solvent A (50 mM ammonium acetate buffer containing 93% acetonitrile, pH 7.0) and solvent B (50 mM ammonium acetate buffer containing 20% acetonitrile, pH 7.0) and the following gradient: linear gradient from 25–42% solvent B at 0.6 mL/min for 180 min followed by a linear gradient from 52–100% solvent B for the next 3 min. NP-HPLC analysis was performed using the Prominence HPLC system with a fluorescence detector (excitation and emission wavelengths of 310 nm and 380 nm, respectively) (Shimadzu, Kyoto, Japan). Each detected PA-*N*-glycan was further analyzed by RP-HPLC using a Develosil C30-UG-5 column ( $4.6 \times 150$  mm, Nomura Chemical, Seto, Japan). The mobile phase consisted of solvent A (5 mM ammonium acetate, pH 4.0) and solvent B (10% acetonitrile with solvent A). The flow rate was 0.5 mL/min and monitored by a fluorescence detector (FP-2025 Plus, JASCO, Hachioji, Japan) using excitation and emission wavelengths of 320 nm and 400 nm, respectively. Glycan structures were identified by calculating the Mannose-Unit value in NP-HPLC and the Glucose-Unit value in RP-HPLC as previously described [5,7] or by comparison to known standards and sequential exoglycosidase digestion. Anion-exchange chromatography was performed using a MonoQ HR5/5 column ( $5 \times 50$  mm, GE Healthcare) at a flow rate of 1.0 mL/min at room temperature. Solvent C was distilled H<sub>2</sub>O titrated to pH 9.0 with 1 M aqueous ammonia, and solvent D was 0.5 M ammonium acetate (pH 9.0). The column was equilibrated with solvent C. After injecting a sample, the proportion of solvent D was increased linearly to 12% in 3 min, to 40% in 14 min, and to 100% in 5 min. PA-sugar chains were detected at an excitation wavelength of 310 nm and emission wavelength of 380 nm (FP-2025 Plus, JASCO).

### Data quantification and statistical analysis

NP-HPLC and RP-HPLC chromatogram data were analyzed with LC station software (Shimadzu) and Empower2 software (Waters, Milford, MA, USA), respectively. Statistical analyses (ROC curve and Pearson's r) were performed using GraphPad Prism7.

### Supplementary References

1. Torii, T.; Yoshimura, T.; Narumi, M.; Hitoshi, S.; Takaki, Y.; Tsuji, S.; Ikenaka, K. Determination of major sialylated N-glycans and identification of branched sialylated N-glycans that dynamically change their content during development in the mouse cerebral cortex. *Glycoconj. J.* **2014**, *31*, 671-683.
2. Tanabe, K.; Ikenaka, K. In-column removal of hydrazine and N-acetylation of oligosaccharides released by hydrazinolysis. *Anal. Biochem.* **2006**, *348*, 324-326.
3. Yoshimura, T.; Yamada, G.; Narumi, M.; Koike, T.; Ishii, A.; Sela, I.; Mitrani-Rosenbaum, S.; Ikenaka, K. Detection of N-glycans on small amounts of glycoproteins in tissue samples and sodium dodecyl sulfate-polyacrylamide gels. *Anal. Biochem.* **2012**, *423*, 253-260.
4. Hase, S.; Natsuka, S.; Oku, H.; Ikenaka, T. Identification method for twelve oligomannose-type sugar chains thought to be processing intermediates of glycoproteins. *Anal. Biochem.* **1987**, *167*, 321-326.
5. Hase, S. High-performance liquid chromatography of pyridylaminated saccharides. *Methods Enzymol.* **1994**, *230*, 225-237.
6. Fujimoto, I.; Menon, K.K.; Otake, Y.; Tanaka, F.; Wada, H.; Takahashi, H.; Tsuji, S.; Natsuka, S.; Nakakita, S.i.; Hase, S.; Ikenaka, K. Systematic analysis of N-linked sugar chains from whole tissue employing partial automation. *Anal. Biochem.* **1999**, *267*, 336-343.
7. Otake, Y.; Fujimoto, I.; Tanaka, F.; Nakagawa, T.; Ikeda, T.; Menon, K.K.; Hase, S.; Wada, H.; Ikenaka, K. Isolation and characterization of an N-linked oligosaccharide that is significantly increased in sera from patients with non-small cell lung cancer. *J. Biochem.* **2001**, *129*, 537-542.
8. Ishii, A.; Ikeda, T.; Hitoshi, S.; Fujimoto, I.; Torii, T.; Sakuma, K.; Nakakita, S.; Hase, S.; Ikenaka, K. Developmental changes in the expression of glycogenes and the content of N-glycans in the mouse cerebral cortex. *Glycobiology* **2007**, *17*, 261-276.
9. Yoshimura, T.; Hayashi, A.; Handa-Narumi, M.; Yagi, H.; Ohno, N.; Koike, T.; Yamaguchi, Y.; Uchimura, K.; Kadomatsu, K.; Sedzik, J.; Kitamura, K.; Kato, K.; Trapp, B.D.; Baba, H.; Ikenaka, K. GlcNAc6ST-1 regulates sulfation of N-glycans and myelination in the peripheral nervous system. *Sci. Rep.* **2017**, *7*, 42257.

**Supplementary Table S1.** Reproducibility of *N*-glycan recovery rate for 3 *N*-glycans.

| Pak No.              | 4               | 13              | 15              |
|----------------------|-----------------|-----------------|-----------------|
| Area (mean $\pm$ SD) | 23.92 $\pm$ 1.5 | 14.72 $\pm$ 0.8 | 17.87 $\pm$ 1.1 |
| CV value (%)         | 6.2             | 5.7             | 6.1             |

**Supplementary Table S2.** ROC curve of A2G1(6)FB in HCC.

|                         | HCV-HCC/LC      |
|-------------------------|-----------------|
| Area                    | 0.9614          |
| Std. Error              | 0.0346          |
| 95% confidence interval | 0.8936 to 1.029 |
| P value                 | <0.0001         |

**Supplementary Table S3.** Sensitivity and specificity of A2G1(6)FB in HCC.

|         | HCV-HCC/HC   |                    |              |                  |                  |
|---------|--------------|--------------------|--------------|------------------|------------------|
|         | Sensitivity% | 95% CI             | Specificity% | 95% CI           | Likelihood ratio |
| > 0.02  | 100          | 93.51% to 100%     | 2.817        | 0.343% to 9.808% | 1.029            |
| > 0.045 | 100          | 93.51% to 100%     | 4.225        | 0.88% to 11.86%  | 1.044            |
| > 0.055 | 100          | 93.51% to 100%     | 5.634        | 1.556% to 13.8%  | 1.06             |
| > 0.065 | 100          | 93.51% to 100%     | 12.68        | 5.964% to 22.7%  | 1.145            |
| > 0.075 | 100          | 93.51% to 100%     | 18.31        | 10.13% to 29.27% | 1.224            |
| > 0.085 | 100          | 93.51% to 100%     | 28.17        | 18.13% to 40.1%  | 1.392            |
| > 0.095 | 100          | 93.51% to 100%     | 40.85        | 29.32% to 53.16% | 1.69             |
| > 0.105 | 100          | 93.51% to 100%     | 49.3         | 37.22% to 61.44% | 1.972            |
| > 0.115 | 100          | 93.51% to 100%     | 61.97        | 49.67% to 73.24% | 2.63             |
| > 0.125 | 100          | 93.51% to 100%     | 66.2         | 53.99% to 77%    | 2.958            |
| > 0.135 | 100          | 93.51% to 100%     | 70.42        | 58.41% to 80.67% | 3.381            |
| > 0.145 | 100          | 93.51% to 100%     | 76.06        | 64.46% to 85.39% | 4.176            |
| > 0.155 | 100          | 93.51% to 100%     | 80.28        | 69.14% to 88.78% | 5.071            |
| > 0.165 | 100          | 93.51% to 100%     | 84.51        | 73.97% to 92%    | 6.455            |
| > 0.18  | 100          | 93.51% to 100%     | 91.55        | 82.51% to 96.84% | 11.83            |
| > 0.2   | 100          | 93.51% to 100%     | 95.77        | 88.14% to 99.12% | 23.67            |
| > 0.22  | 100          | 93.51% to 100%     | 97.18        | 90.19% to 99.66% | 35.5             |
| > 0.235 | 98.18        | 90.28% to 99.95%   | 98.59        | 92.4% to 99.96%  | 69.71            |
| > 0.245 | 96.36        | 87.47% to 99.56%   | 98.59        | 92.4% to 99.96%  | 68.42            |
| > 0.26  | 94.55        | 84.88% to 98.86%   | 100          | 94.94% to 100%   |                  |
| > 0.275 | 92.73        | 82.41% to 97.98%   | 100          | 94.94% to 100%   |                  |
| > 0.285 | 90.91        | 80.05% to 96.98%   | 100          | 94.94% to 100%   |                  |
| > 0.3   | 87.27        | 75.52% to 94.73%   | 100          | 94.94% to 100%   |                  |
| > 0.315 | 85.45        | 73.34% to 93.5%    | 100          | 94.94% to 100%   |                  |
| > 0.325 | 80           | 67.03% to 89.57%   | 100          | 94.94% to 100%   |                  |
| > 0.335 | 78.18        | 64.99% to 88.19%   | 100          | 94.94% to 100%   |                  |
| > 0.345 | 74.55        | 61% to 85.33%      | 100          | 94.94% to 100%   |                  |
| > 0.355 | 72.73        | 59.04% to 83.86%   | 100          | 94.94% to 100%   |                  |
| > 0.365 | 70.91        | 57.1% to 82.37%    | 100          | 94.94% to 100%   |                  |
| > 0.375 | 69.09        | 55.19% to 80.86%   | 100          | 94.94% to 100%   |                  |
| > 0.385 | 67.27        | 53.29% to 79.32%   | 100          | 94.94% to 100%   |                  |
| > 0.395 | 65.45        | 51.42% to 77.76%   | 100          | 94.94% to 100%   |                  |
| > 0.405 | 63.64        | 49.56% to 76.19%   | 100          | 94.94% to 100%   |                  |
| > 0.415 | 61.82        | 47.73% to 74.59%   | 100          | 94.94% to 100%   |                  |
| > 0.43  | 60           | 45.91% to 72.98%   | 100          | 94.94% to 100%   |                  |
| > 0.445 | 56.36        | 42.32% to 69.7%    | 100          | 94.94% to 100%   |                  |
| > 0.455 | 54.55        | 40.55% to 68.03%   | 100          | 94.94% to 100%   |                  |
| > 0.47  | 52.73        | 38.8% to 66.35%    | 100          | 94.94% to 100%   |                  |
| > 0.485 | 49.09        | 35.35% to 62.93%   | 100          | 94.94% to 100%   |                  |
| > 0.495 | 47.27        | 33.65% to 61.2%    | 100          | 94.94% to 100%   |                  |
| > 0.505 | 40           | 27.02% to 54.09%   | 100          | 94.94% to 100%   |                  |
| > 0.515 | 38.18        | 25.41% to 52.27%   | 100          | 94.94% to 100%   |                  |
| > 0.525 | 34.55        | 22.24% to 48.58%   | 100          | 94.94% to 100%   |                  |
| > 0.54  | 32.73        | 20.68% to 46.71%   | 100          | 94.94% to 100%   |                  |
| > 0.555 | 30.91        | 19.14% to 44.81%   | 100          | 94.94% to 100%   |                  |
| > 0.575 | 29.09        | 17.63% to 42.9%    | 100          | 94.94% to 100%   |                  |
| > 0.595 | 27.27        | 16.14% to 40.96%   | 100          | 94.94% to 100%   |                  |
| > 0.605 | 25.45        | 14.67% to 39%      | 100          | 94.94% to 100%   |                  |
| > 0.615 | 21.82        | 11.81% to 35.01%   | 100          | 94.94% to 100%   |                  |
| > 0.645 | 18.18        | 9.079% to 30.9%    | 100          | 94.94% to 100%   |                  |
| > 0.675 | 16.36        | 7.766% to 28.8%    | 100          | 94.94% to 100%   |                  |
| > 0.69  | 14.55        | 6.495% to 26.66%   | 100          | 94.94% to 100%   |                  |
| > 0.72  | 12.73        | 5.274% to 24.48%   | 100          | 94.94% to 100%   |                  |
| > 0.75  | 10.91        | 4.11% to 22.25%    | 100          | 94.94% to 100%   |                  |
| > 0.765 | 9.091        | 3.018% to 19.95%   | 100          | 94.94% to 100%   |                  |
| > 0.785 | 7.273        | 2.017% to 17.59%   | 100          | 94.94% to 100%   |                  |
| > 0.805 | 5.455        | 1.139% to 15.12%   | 100          | 94.94% to 100%   |                  |
| > 0.88  | 1.818        | 0.04602% to 9.719% | 100          | 94.94% to 100%   |                  |

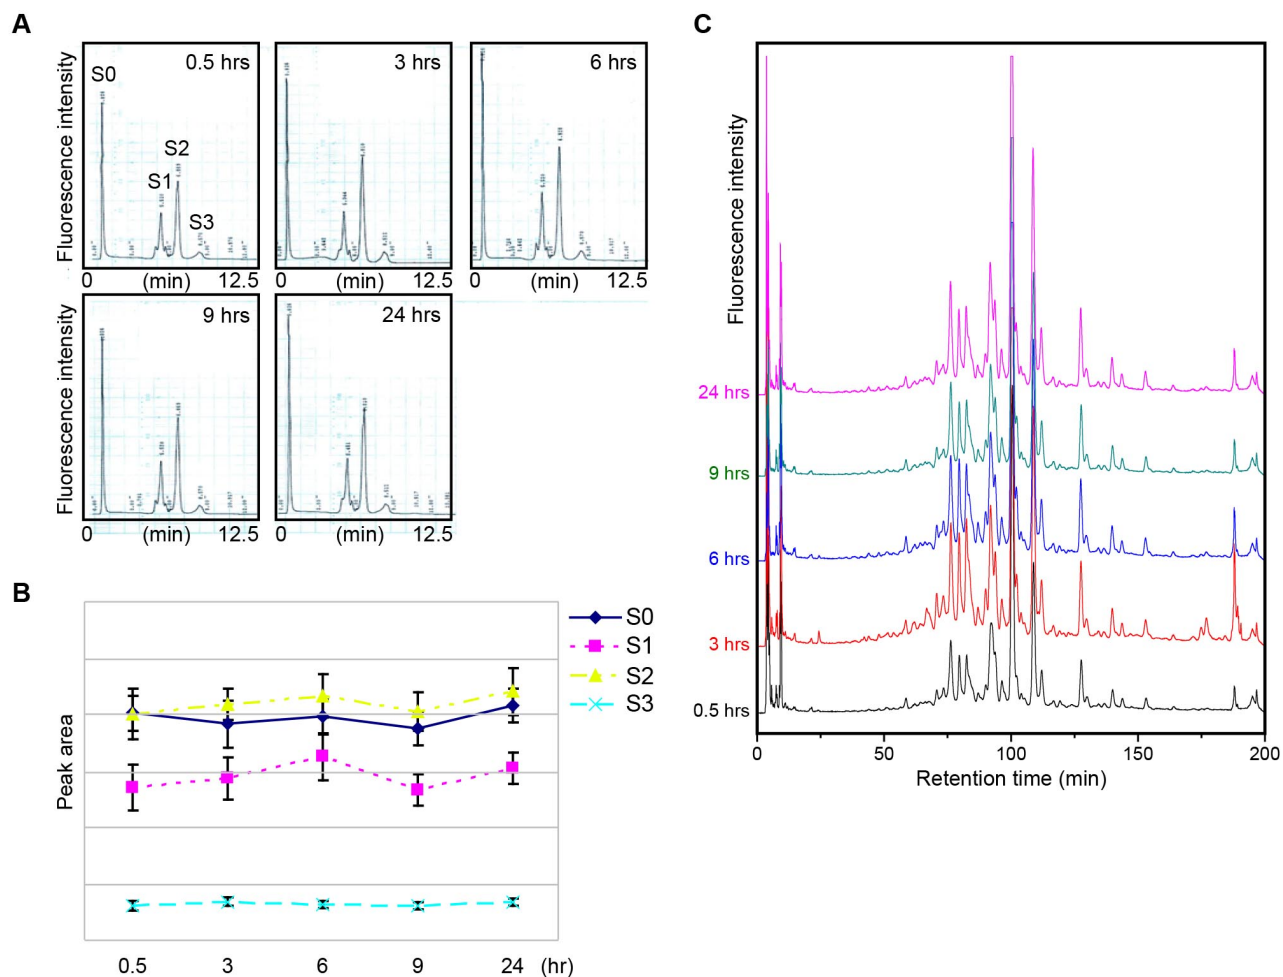

**Supplementary Figure S1.** Stability of sialylated *N*-glycans in sera.

(A) Chromatogram of anion-exchange chromatography showing the separation of *N*-glycans according to the number of sialic acid residues. S0, S1, S2 and S3 indicate the elution positions of neutral, monosialo, disialo and trisialo PA-oligosaccharides, respectively. (B) Levels of sialylated *N*-glycans in sera prepared at 0.5 h, 3 h, 6 h, 9 h, and 24 h after blood collection. No changes in the level of sialylated *N*-glycans were observed. Error bars represent standard deviation (SD). (C) Chromatogram of NP-HPLC after neuraminidase treatment. *N*-glycan elution profiles were stable 24 h after blood collection.

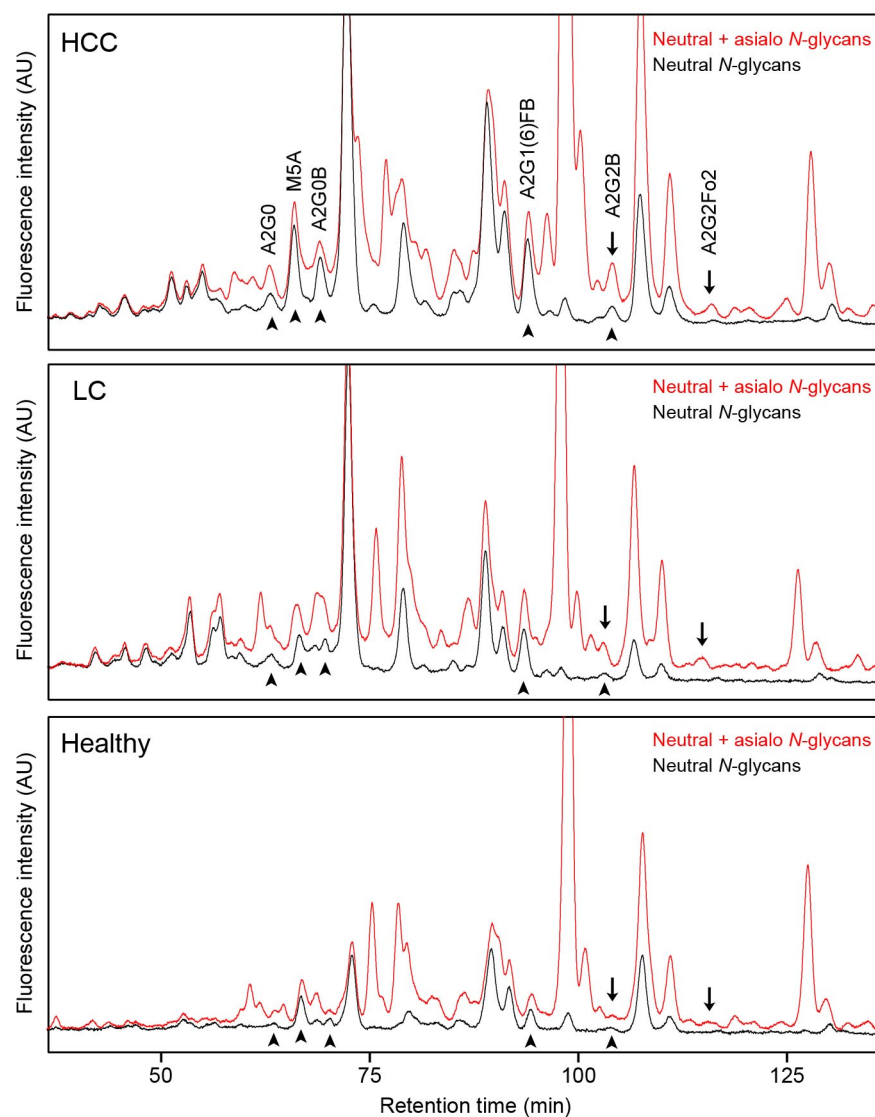

**Supplementary Figure S2.** NP-HPLC chromatogram of neutral and neutral + asialo *N*-glycans.

Distinct changes of neutral *N*-glycans in HCC and LC patients compared with those in healthy controls. Arrowheads and arrows indicate neutral *N*-glycans and neutral + asialo *N*-glycans respectively. *HCC*: a patient with hepatocellular carcinoma, *LC*: a patient with liver cirrhosis, *Healthy*: healthy control.

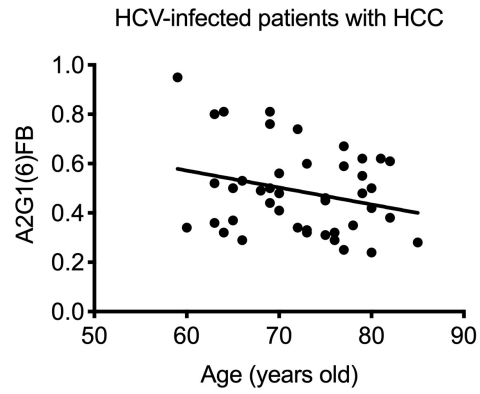

**Supplementary Figure S3.** Correlation between age and A2G1(6)FB expression in HCV-infected HCC patients. There was no significant correlation between age and A2G1(6)FB expression ( $r = -0.2635$ ,  $P = 0.0878$ ) (Pearson's  $r$ ).

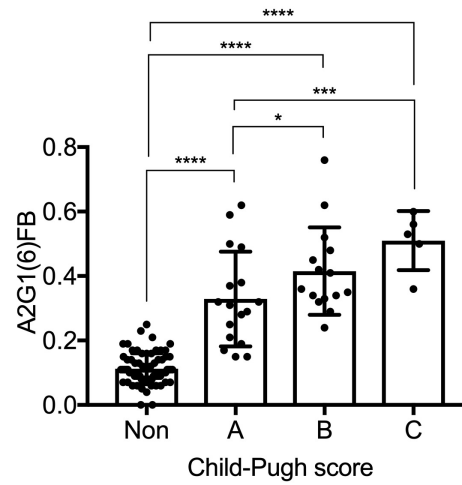

**Supplementary Figure S4.** A2G1(6)FB expression levels and Child-Pugh classification.

A2G1(6)FB expression levels were examined in groups classified by the Child-Pugh score (Non (n=71) vs A (n=17);  $P<0.0001$ , Non (n=71) vs B (n=15);  $P<0.0001$ , Non (n=71) vs C (n=5);  $P<0.0001$ , A (n=17) vs B (n=15);  $P=0.0316$ , A (n=17) vs C (n=5);  $P=0.0005$ ) (one-way ANOVA). *Non: non-classified samples.*

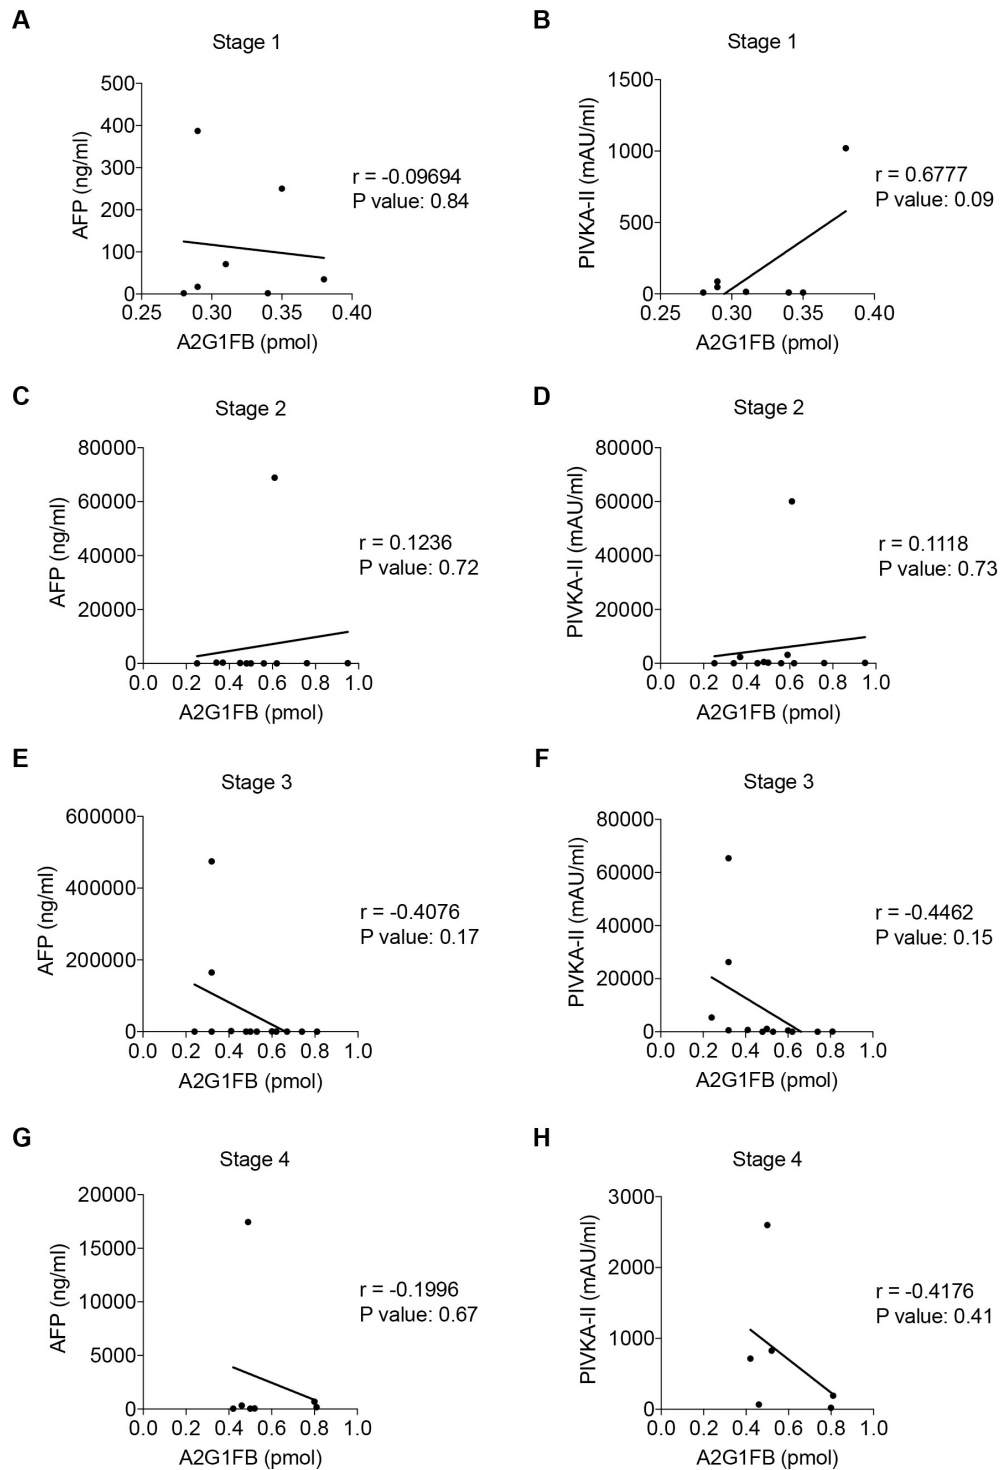

**Supplementary Figure S5.** A2G1(6)FB expression level is not correlated with AFP or PIVKA-II.

(A–H) Correlations in each stage of hepatocellular carcinoma between A2G1(6)FB and AFP or PIVKA-II. There were no correlations in all stages of HCC. *AFP*:  $\alpha$ -fetoprotein, *PIVKA-II*: protein induced by vitamin K absence or antagonists-II.
